# Supplementary material
Source: PubMed Central journal article supplement (PMC3743244)
Supplement: NIHMS419635-supplement-01.pdf [file NIHMS419635-supplement-01.pdf]

Supplementary Table 1

| SNP | rs384<br>9942 | rs133<br>0921 | rs1012<br>1765 | rs111<br>0264 | rs111<br>0155 | rs215<br>0336 | rs222<br>5389 | rs116<br>1680 | rs212<br>0718 | rs258<br>9054 | rs1081<br>2596 | rs105<br>8326 | rs944<br>404 | rs765<br>709 |
|-----|---------------|---------------|----------------|---------------|---------------|---------------|---------------|---------------|---------------|---------------|----------------|---------------|--------------|--------------|
|     | Risk alleles  |               |                |               |               |               |               |               |               |               |                |               |              |              |
| ID  | A             | T             | C              | A             | A             | C             | C             | G             | G             | G             | A              | C             | T            | A            |
| 158 | AG            | TT            | AC             | GG            | AA            | TT            | AA            | AA            | AA            | GG            | AA             | CC            | TT           | AA           |
| 198 | AG            | TT            | AA             | GG            | AA            | TT            | AA            | AA            | AA            | GG            | AA             | CC            | TT           | AA           |
| 211 | AA            | TT            | AA             | GG            | AA            | TT            | AA            | AA            | AA            | GG            | AA             | CC            | TT           | AA           |
| 223 | AA            | TT            | AC             | AG            | AC            | TC            | AA            | AG            | GG            | AA            | AG             | TC            | TC           | AA           |
| 81  | GG            | TT            | AC             | AG            | AC            | TC            | AA            | GG            | GG            | AA            | GG             | CC            | CC           | AC           |
| 83  | AG            | TC            | AC             | AG            | AC            | TC            | AA            | AG            | GG            | AA            | AG             | TC            | TC           | AA           |
| 85  | AG            | TT            | CC             | GG            | AA            | TC            | AA            | AG            | AG            | AG            | AA             | TC            | TC           | AA           |
| 88  | AG            | TT            | AC             | GG            | AA            | TT            | AA            | AA            | AG            | AG            | AA             | TC            | TT           | AA           |
| 89  | AG            | TT            | CC             | GG            | AA            | TT            | AA            | AA            | GG            | AA            | AA             | TT            | TT           | AA           |
| 90  | GG            | TC            | CC             | GG            | AA            | TC            | AC            | AG            | GG            | AG            | AA             | TC            | TC           | AA           |
| 95  | GG            | TT            | AA             | AA            | CC            | CC            | AA            | GG            | GG            | AA            | GG             | CC            | CC           | AA           |
| 96  | AG            | TT            | AC             | GG            | AA            | TT            | AA            | AG            | AG            | AG            | AG             | CC            | TC           | AC           |
| 97  | GG            | TT            | AC             | GG            | AA            | TT            | AA            | AA            | AG            | AG            | AA             | TC            | TT           | AA           |
| 98  | AG            | TT            | AA             | AA            | CC            | CC            | AA            | GG            | GG            | AG            | AG             | CC            | TC           | AA           |
| 99  | AG            | TT            | CC             | GG            | AA            | TC            | AC            | GG            | GG            | AG            | AG             | CC            | CC           | AC           |
| 101 | GG            | TT            | CC             | GG            | AA            | TC            | AC            | AG            | GG            | AG            | AA             | TC            | TC           | AA           |
| 103 | AG            | TT            | AA             | GG            | AA            | TT            | AA            | AA            | AG            | AG            | AA             | TC            | TT           | AA           |
| 107 | GG            | TT            | AC             | AA            | AC            | TC            | AA            | GG            | GG            | AA            | GG             | CC            | CC           | AC           |
| 111 | GG            | TT            | AC             | AG            | AC            | TC            | AA            | AG            | GG            | AA            | AG             | TC            | TC           | AA           |
| 114 | GG            | TT            | AC             | AG            | AC            | TC            | AC            | AG            | AG            | GG            | AA             | CC            | TC           | AA           |
| 115 | GG            | TT            | CC             | GG            | AA            | TT            | AA            | GG            | GG            | AA            | GG             | TC            | TC           | AC           |
| 118 | GG            | CC            | CC             | GG            | AC            | TC            | AA            | AA            | AG            | AG            | AA             | TT            | TT           | AA           |
| 123 | AG            | TC            | CC             | GG            | AA            | TT            | AA            | AA            | AG            | AG            | AA             | TC            | TT           | AA           |
| 124 | AG            | TT            | AC             | AG            | AC            | TC            | AA            | AG            | GG            | AA            | AG             | TC            | TC           | AA           |
| 127 | GG            | TT            | AC             | AG            | AA            | TC            | AC            | AG            | GG            | AG            | AA             | TC            | TT           | AA           |
| 128 | GG            | TT            | AC             | AG            | AC            | TC            | AA            | AG            | GG            | AA            | AG             | TC            | TC           | AA           |
| 134 | GG            | TT            | AC             | GG            | AA            | TT            | AA            | AA            | GG            | AA            | AA             | TT            | TT           | AA           |
| 136 | GG            | TT            | AC             | AG            | AC            | TC            | AA            | GG            | GG            | AA            | GG             | CC            | CC           | AC           |
| 139 | AG            | TT            | CC             | GG            | AA            | TT            | AA            | AG            | GG            | AA            | AG             | TC            | TC           | AC           |
| 143 | AG            | TT            | CC             | GG            | AA            | TC            | AA            | AA            | GG            | AA            | AA             | TT            | TT           | AA           |
| 144 | AG            | TT            | AC             | GG            | AA            | TT            | AA            | AA            | AG            | AG            | AA             | TC            | TT           | AA           |
| 163 | AA            | TC            | CC             | GG            | AA            | TT            | AA            | AG            | GG            | AA            | AG             | TC            | TC           | AC           |
| 176 | GG            | TT            | CC             | GG            | AA            | TC            | AC            | AG            | GG            | AG            | AA             | TC            | TC           | AA           |
| 177 | AG            | TT            | CC             | GG            | AA            | TT            | AA            | AA            | GG            | AA            | AA             | TT            | TT           | AA           |
| 183 | GG            | TC            | AC             | AG            | AC            | TC            | AA            | AG            | GG            | AA            | AG             | TC            | TC           | AA           |
| 194 | GG            | TT            | AA             | AG            | AC            | TC            | AA            | AG            | AG            | AG            | AG             | CC            | TC           | AA           |
| 195 | GG            | TT            | AA             | AG            | AC            | TC            | AA            | AA            | AG            | GG            | AA             | CC            | TT           | AA           |
| 199 | GG            | TC            | AA             | AG            | AC            | TC            | AA            | AG            | AG            | AG            | AG             | CC            | TC           | AA           |
| 200 | GG            | TC            | AC             | GG            | AA            | TT            | AA            | AA            | GG            | AG            | AA             | TC            | TT           | AA           |
| 201 | GG            | TT            | CC             | AG            | AC            | TT            | AA            | AA            | AG            | AG            | AA             | TC            | TT           | AA           |
| 203 | GG            | TT            | AC             | GG            | AA            | TT            | AA            | AA            | GG            | AA            | AA             | TT            | TT           | AA           |
| 205 | AG            | TT            | AC             | GG            | AA            | TT            | AA            | AG            | AG            | AG            | AG             | CC            | TC           | AC           |
| 207 | AG            | TT            | AC             | AG            | AC            | TC            | AA            | AG            | GG            | AA            | AG             | TC            | TC           | AA           |
| 209 | GG            | TT            | AC             | AG            | AA            | TC            | AC            | AG            | GG            | GG            | AA             | CC            | TT           | AA           |
| 210 | GG            | TC            | CC             | GG            | AA            | TT            | AA            | AA            | GG            | AA            | AA             | TT            | TT           | AA           |
| 212 | GG            | TT            | CC             | GG            | AA            | TT            | AA            | AG            | GG            | AA            | AG             | TC            | TC           | AC           |
| 215 | GG            | TT            | AC             | GG            | AA            | TT            | AA            | AA            | AG            | AG            | AA             | TC            | TT           | AA           |
| 216 | AG            | TT            | AA             | AG            | AC            | TT            | AA            | AA            | AA            | GG            | AA             | CC            | TT           | AA           |
| 217 | GG            | TT            | CC             | GG            | AC            | TC            | AA            | AG            | AG            | AG            | AG             | TC            | TC           | AC           |
| 218 | AA            | TT            | AA             | AG            | AC            | TC            | AA            | AG            | AG            | AG            | AG             | CC            | TC           | AA           |
| 219 | GG            | TT            | AC             | AG            | AC            | TC            | AA            | GG            | GG            | AA            | GG             | CC            | CC           | AC           |
| 221 | AG            | TT            | AC             | AG            | AC            | TC            | AA            | AG            | AG            | AG            | AG             | CC            | TC           | AA           |
| 222 | GG            | TT            | AA             | GG            | AA            | TT            | AA            | AA            | AG            | AG            | AA             | TC            | TT           | AA           |

Supplementary Table 1 continued

| SNP | rs131<br>6679 | rs440<br>6503 | rs1051<br>1817 | rs725<br>804 | rs1051<br>1816 | rs144<br>4533 | rs182<br>2723 | rs487<br>9515 | rs895<br>023 | rs868<br>856 | rs704<br>6653 | rs244<br>0622 | rs197<br>7661 | rs903<br>603 |
|-----|---------------|---------------|----------------|--------------|----------------|---------------|---------------|---------------|--------------|--------------|---------------|---------------|---------------|--------------|
|     | Risk alleles  |               |                |              |                |               |               |               |              |              |               |               |               |              |
| ID  | G             | G             | C              | A            | T              | A             | C             | T             | T            | T            | A             | A             | C             | C            |
| 158 | GG            | GG            | CC             | AA           | TG             | AA            | TC            | TT            | TT           | TC           | AG            | AA            | AC            | TC           |
| 198 | GG            | GG            | CC             | AA           | GG             | GG            | CC            | CC            | TT           | TC           | AG            | AA            | CC            | TC           |
| 211 | GG            | GG            | CC             | AA           | TG             | AA            | CC            | TT            | TT           | TT           | AA            | AA            | CC            | CC           |
| 223 | GG            | GG            | CC             | CC           | TG             | AA            | CC            | TT            | TT           | TT           | AA            | AA            | CC            | CC           |
| 81  | AG            | AG            | AC             | AC           | GG             | AA            | TC            | TC            | TT           | CC           | GG            | AA            | AC            | TT           |
| 83  | GG            | GG            | CC             | CC           | TG             | AA            | CC            | TC            | TT           | TC           | AG            | AA            | CC            | TC           |
| 85  | GG            | GG            | CC             | CC           | GG             | AG            | TC            | TT            | TT           | TC           | AG            | AA            | AC            | TC           |
| 88  | GG            | GG            | CC             | AC           | TG             | AA            | TC            | TT            | TT           | TC           | AG            | AA            | AC            | TC           |
| 89  | GG            | GG            | CC             | CC           | TG             | AA            | TC            | TT            | TT           | TC           | AG            | AA            | AC            | TC           |
| 90  | GG            | GG            | CC             | AC           | GG             | AA            | TC            | TC            | TC           | TC           | AG            | AC            | CC            | CC           |
| 95  | GG            | GG            | CC             | CC           | TG             | AA            | TC            | TT            | TT           | CC           | GG            | AA            | AC            | TC           |
| 96  | AG            | AG            | AC             | AA           | TG             | AG            | CC            | TC            | TT           | TC           | AG            | AA            | CC            | TC           |
| 97  | GG            | GG            | CC             | AC           | TG             | AA            | TC            | TT            | TT           | CC           | GG            | AA            | AC            | TC           |
| 98  | GG            | GG            | CC             | AC           | GG             | AA            | TC            | CC            | TT           | CC           | GG            | AA            | CC            | TT           |
| 99  | AG            | AG            | AC             | AA           | GG             | AA            | TC            | TC            | TT           | TC           | AG            | AA            | CC            | CC           |
| 101 | GG            | GG            | CC             | AC           | GG             | AG            | TC            | TC            | TT           | CC           | GG            | AA            | CC            | TC           |
| 103 | GG            | GG            | CC             | AC           | TG             | AG            | CC            | TC            | TT           | TC           | AG            | AA            | CC            | TC           |
| 107 | AG            | AG            | AC             | AC           | GG             | AG            | TC            | TC            | TT           | CC           | GG            | AA            | AC            | TT           |
| 111 | GG            | GG            | CC             | CC           | TG             | AA            | CC            | CC            | TT           | CC           | GG            | AA            | CC            | TT           |
| 114 | GG            | GG            | CC             | AA           | GG             | GG            | CC            | CC            | TT           | CC           | GG            | AA            | CC            | TT           |
| 115 | AG            | AG            | AC             | AC           | TG             | AA            | TC            | TC            | TT           | CC           | GG            | AA            | CC            | CC           |
| 118 | GG            | GG            | CC             | CC           | TG             | AA            | TC            | TC            | TT           | CC           | GG            | AA            | CC            | CC           |
| 123 | GG            | GG            | CC             | AC           | TG             | AG            | CC            | TC            | TT           | TC           | AG            | AA            | CC            | CC           |
| 124 | GG            | GG            | CC             | CC           | TT             | AA            | CC            | TT            | TT           | TC           | AG            | AA            | CC            | CC           |
| 127 | GG            | GG            | CC             | AC           | GG             | AG            | CC            | CC            | TT           | CC           | GG            | AA            | CC            | TT           |
| 128 | GG            | GG            | CC             | CC           | TG             | AG            | TC            | CC            | TT           | CC           | GG            | AA            | CC            | TT           |
| 134 | GG            | GG            | CC             | AC           | TG             | AA            | TC            | CC            | TT           | CC           | GG            | AA            | CC            | TT           |
| 136 | AG            | AG            | AC             | AC           | GG             | AG            | TC            | TC            | TT           | CC           | GG            | AA            | AC            | TT           |
| 139 | AG            | AG            | AC             | AC           | TG             | AA            | CC            | TT            | TT           | TC           | AG            | AA            | CC            | CC           |
| 143 | GG            | GG            | CC             | CC           | TG             | AA            | CC            | TT            | TT           | TC           | AG            | AA            | CC            | CC           |
| 144 | GG            | GG            | CC             | AC           | TG             | AA            | TT            | TC            | TT           | TC           | AG            | AA            | CC            | CC           |
| 163 | AG            | AG            | AC             | AC           | TT             | AA            | CC            | TT            | TT           | TT           | AA            | AA            | CC            | CC           |
| 176 | GG            | GG            | CC             | AC           | GG             | AG            | CC            | CC            | TT           | CC           | GG            | AA            | CC            | TT           |
| 177 | GG            | GG            | CC             | CC           | TG             | AA            | TC            | TT            | TT           | TC           | AG            | AA            | CC            | CC           |
| 183 | GG            | GG            | CC             | CC           | TG             | AA            | TC            | CC            | TT           | CC           | GG            | AA            | CC            | TT           |
| 194 | GG            | GG            | CC             | AC           | GG             | AG            | CC            | TC            | TT           | CC           | GG            | AA            | CC            | TC           |
| 195 | GG            | GG            | CC             | AC           | TG             | GG            | CC            | TC            | TT           | TC           | AG            | AA            | CC            | TC           |
| 199 | GG            | GG            | CC             | AC           | GG             | AG            | TC            | TC            | TT           | CC           | GG            | AA            | AC            | TT           |
| 200 | GG            | GG            | CC             | CC           | GG             | GG            | CC            | TC            | TT           | TC           | AG            | AA            | CC            | TC           |
| 201 | GG            | GG            | CC             | AC           | TG             | AA            | CC            | TT            | TT           | TC           | AG            | AA            | CC            | CC           |
| 203 | GG            | GG            | CC             | AC           | TG             | AA            | TT            | CC            | TC           | TC           | AG            | AC            | CC            | TC           |
| 205 | AG            | AG            | AC             | AA           | TT             | AA            | CC            | TT            | TT           | TC           | AG            | AA            | CC            | CC           |
| 207 | GG            | GG            | CC             | CC           | TG             | AG            | TC            | TC            | TT           | TC           | AG            | AA            | CC            | TC           |
| 209 | GG            | GG            | CC             | AC           | TG             | AA            | TT            | CC            | TC           | TC           | AG            | AC            | CC            | CC           |
| 210 | GG            | GG            | CC             | CC           | TG             | AA            | TC            | TC            | TT           | CC           | GG            | AA            | CC            | CC           |
| 212 | AG            | AG            | AC             | AC           | GG             | GG            | CC            | CC            | TT           | CC           | GG            | AA            | CC            | CC           |
| 215 | GG            | GG            | CC             | AC           | TG             | GG            | CC            | CC            | TT           | CC           | GG            | AA            | CC            | TT           |
| 216 | GG            | GG            | CC             | AA           | TG             | AA            | CC            | TT            | TT           | TC           | AG            | AA            | CC            | CC           |
| 217 | AG            | AG            | AC             | AC           | GG             | AA            | CC            | CC            | TT           | CC           | GG            | AA            | CC            | TT           |
| 218 | GG            | GG            | CC             | AC           | TT             | AA            | CC            | TT            | TT           | TT           | AA            | AA            | CC            | CC           |
| 219 | AG            | AG            | AC             | AC           | GG             | AG            | TC            | CC            | TT           | CC           | GG            | AA            | CC            | TT           |
| 221 | GG            | GG            | CC             | AC           | GG             | AA            | CC            | CC            | TT           | CC           | GG            | AA            | CC            | TC           |
| 222 | GG            | GG            | CC             | AC           | GG             | AA            | CC            | CC            | TT           | CC           | GG            | AA            | CC            | TT           |

Supplementary Table 1 continued

| SNP          | rs1081<br>2610 | rs281<br>4707 | rs1234<br>9820 | rs1012<br>2902 | rs1075<br>7665 | rs156<br>5948 | rs774<br>359 | rs228<br>2241 | rs194<br>8522 | rs198<br>2915 | rs245<br>3556 | rs702<br>231 | rs696<br>826 | rs247<br>7518 |
|--------------|----------------|---------------|----------------|----------------|----------------|---------------|--------------|---------------|---------------|---------------|---------------|--------------|--------------|---------------|
| Risk alleles |                |               |                |                |                |               |              |               |               |               |               |              |              |               |
| ID           | C              | A             | T              | G              | T              | G             | C            | G             | C             | G             | G             | A            | G            | T             |
| 158          | AC             | AG            | TT             | GG             | TT             | GG            | TC           | TG            | CC            | GG            | GG            | AA           | GG           | TT            |
| 198          | AC             | AG            | TT             | GG             | TT             | GG            | TC           | TG            | CC            | GG            | AG            | AC           | GG           | TT            |
| 211          | CC             | AA            | TT             | GG             | TT             | GG            | CC           | GG            | CC            | GG            | GG            | AA           | GG           | TT            |
| 223          | CC             | AA            | TT             | GG             | TT             | GG            | CC           | GG            | CC            | GG            | GG            | AA           | GG           | CC            |
| 81           | AA             | GG            | TT             | GG             | TT             | GG            | TT           | TT            | TC            | AG            | AA            | AC           | GG           | TT            |
| 83           | AC             | AG            | TC             | GG             | TC             | AG            | TC           | GG            | CC            | AG            | AG            | AA           | GG           | TT            |
| 85           | AC             | AG            | TT             | GG             | TT             | GG            | TC           | TG            | CC            | AG            | AG            | AA           | GG           | TT            |
| 88           | AC             | AG            | TT             | GG             | TT             | GG            | TC           | TG            | CC            | AG            | AG            | AA           | GG           | TT            |
| 89           | AC             | AG            | TT             | GG             | TT             | GG            | TC           | TG            | CC            | AA            | AA            | AA           | GG           | TT            |
| 90           | AC             | GG            | TT             | AG             | TT             | AA            | TC           | TG            | TC            | GG            | AG            | AC           | AG           | CC            |
| 95           | AC             | GG            | TT             | AG             | TT             | AG            | TT           | TT            | TC            | AG            | AG            | AA           | GG           | TT            |
| 96           | AC             | AG            | TT             | GG             | TT             | GG            | TC           | TG            | CC            | AG            | AG            | AC           | AG           | TC            |
| 97           | AC             | GG            | TT             | AG             | TT             | AG            | TT           | TT            | TC            | GG            | AG            | AC           | AG           | CC            |
| 98           | AA             | GG            | TC             | GG             | TC             | AG            | TC           | GG            | CC            | AG            | AG            | AA           | GG           | TT            |
| 99           | CC             | AG            | TT             | GG             | TT             | AG            | TC           | TG            | TC            | GG            | AG            | AC           | GG           | TC            |
| 101          | AC             | GG            | TC             | AG             | TC             | AA            | TT           | TG            | CC            | AG            | AG            | AA           | GG           | TT            |
| 103          | AC             | AG            | TT             | GG             | TT             | GG            | TC           | TG            | CC            | AG            | AG            | AA           | GG           | TC            |
| 107          | AC             | GG            | TT             | GG             | TT             | GG            | TT           | TT            | TC            | GG            | AG            | AC           | AG           | CC            |
| 111          | AA             | GG            | TC             | GG             | TC             | AG            | TT           | TG            | CC            | AA            | AG            | AA           | GG           | TC            |
| 114          | AA             | GG            | TT             | GG             | TT             | GG            | TT           | TT            | CC            | AA            | AA            | AA           | GG           | TT            |
| 115          | CC             | GG            | TC             | AG             | TC             | AA            | TT           | TG            | TC            | AG            | AG            | AC           | AG           | TC            |
| 118          | CC             | GG            | TT             | AA             | TT             | AA            | TT           | TG            | TT            | GG            | GG            | AC           | AG           | CC            |
| 123          | CC             | AG            | TT             | AG             | TT             | AG            | TC           | GG            | TC            | GG            | AG            | AA           | GG           | TC            |
| 124          | CC             | AG            | TT             | AG             | TT             | AG            | TC           | TG            | TC            | AG            | AG            | AA           | GG           | TT            |
| 127          | AA             | GG            | TC             | GG             | TC             | AG            | TT           | TG            | CC            | AA            | AG            | AA           | GG           | TT            |
| 128          | AA             | GG            | TT             | AG             | TT             | AG            | TT           | TT            | TC            | AG            | AG            | AC           | AG           | TC            |
| 134          | AA             | GG            | CC             | GG             | CC             | AA            | TT           | GG            | CC            | AA            | AA            | AA           | GG           | TT            |
| 136          | AA             | GG            | TC             | GG             | TC             | AG            | TT           | TG            | CC            | AA            | AA            | AA           | GG           | TT            |
| 139          | CC             | AG            | TT             | AG             | TT             | AG            | TC           | TG            | TC            | GG            | GG            | AC           | AG           | CC            |
| 143          | CC             | AG            | TT             | AG             | TT             | AG            | TC           | TG            | TC            | GG            | GG            | AC           | AG           | CC            |
| 144          | CC             | AG            | TT             | AG             | TT             | AG            | TC           | GG            | TC            | GG            | GG            | AA           | GG           | TT            |
| 163          | CC             | AA            | TT             | GG             | TT             | GG            | CC           | GG            | CC            | GG            | GG            | CC           | AA           | CC            |
| 176          | AA             | GG            | TC             | GG             | TC             | AG            | TT           | TG            | CC            | AA            | AG            | AC           | GG           | TC            |
| 177          | CC             | AG            | TT             | AG             | TT             | AG            | TC           | TG            | CC            | AG            | AG            | AC           | AG           | TC            |
| 183          | AA             | GG            | CC             | GG             | CC             | AA            | TT           | GG            | CC            | AA            | AA            | AA           | GG           | TT            |
| 194          | AC             | GG            | TT             | AG             | TT             | AG            | TT           | TT            | CC            | AG            | AA            | AC           | GG           | TT            |
| 195          | AC             | GG            | TT             | AG             | TT             | AG            | TT           | TT            | CC            | AA            | AG            | AC           | GG           | TT            |
| 199          | AA             | GG            | TT             | GG             | TT             | GG            | TT           | TT            | CC            | AG            | AA            | AA           | GG           | TT            |
| 200          | AC             | GG            | TT             | AG             | TT             | AG            | TT           | TT            | CC            | AA            | AG            | AA           | GG           | TC            |
| 201          | CC             | AG            | TT             | AG             | TT             | AG            | TT           | TT            | TC            | AG            | AG            | AC           | AG           | TC            |
| 203          | AC             | GG            | TC             | AG             | TC             | AA            | TT           | TG            | TC            | AG            | AG            | AA           | GG           | TC            |
| 205          | CC             | AG            | TT             | AG             | TT             | AG            | TC           | TG            | TC            | GG            | GG            | AC           | AG           | CC            |
| 207          | AC             | AG            | TC             | GG             | TC             | AG            | TC           | GG            | CC            | AG            | AG            | AA           | GG           | TT            |
| 209          | AC             | GG            | TT             | AG             | TT             | AA            | TC           | GG            | TC            | GG            | AG            | AA           | GG           | TC            |
| 210          | CC             | GG            | TT             | AA             | TT             | AA            | TT           | TG            | TT            | GG            | GG            | AC           | AG           | CC            |
| 212          | CC             | GG            | TT             | AG             | TT             | AA            | TT           | TG            | TT            | GG            | AG            | AC           | GG           | TC            |
| 215          | AA             | GG            | TT             | GG             | TT             | GG            | TT           | TT            | CC            | AA            | AA            | AA           | GG           | TT            |
| 216          | CC             | AG            | TT             | AG             | TT             | AG            | TC           | TG            | TC            | GG            | GG            | CC           | AA           | CC            |
| 217          | AA             | GG            | CC             | GG             | CC             | AA            | TT           | GG            | CC            | AA            | AA            | AA           | GG           | TT            |
| 218          | CC             | AA            | TT             | GG             | TT             | GG            | CC           | GG            | CC            | GG            | GG            | AA           | GG           | TC            |
| 219          | AA             | GG            | TC             | GG             | TC             | AG            | TT           | TG            | CC            | AA            | AG            | AA           | GG           | TT            |
| 221          | AC             | AG            | TT             | GG             | TT             | GG            | TC           | TG            | CC            | AG            | AG            | AA           | GG           | TT            |
| 222          | AA             | GG            | CC             | GG             | CC             | AA            | TT           | GG            | CC            | AA            | AA            | AC           | AG           | TC            |

**Supplemental or Multimedia Files**

[Click here to download Supplemental or Multimedia Files: Supplementary clinical data.docx](#)
